# Supplementary material
Source: Elsevier journal article supplement (https://www.sciencedirect.com/science/article/pii/S2173507721000600)
Supplement: mmc2 [file S2173507721000600:mmc2.doc]

**ANEXO 2**

**LISTADO DE AUTORES QUE NO HAN PODIDO CONTACTARSE PARA COMPLETAR DATOS**

- Qiu J, Yang G, Wang H, Fu Ch, Wang D, Mei T. Feasibility of ambulatory surgery for anal fistula with LIFT procedure. BMC Gastroenterol 2019, 19:81.
- Lau YC, Brown KG, Cheong J, Byme CH, Lee PJ. LIFT and BoLIFT: a 10 year single-center experience of treating complex fistula-in-ano with ligation of intersphincteric fistula tract procedure with or without Bio-prosthetic reinforcement (BioLIFT). J Gastroenterol Surg. <https://doi.org/10.1007/s11605-019-04305-x>.
- Madbouly KM, Shazly WE, Abbas KS, Hussein AM. Ligation of intersphincteric fistula tract versus mucosal advancement flap in patients with high transsphincteric fistula-in-ano: A prospective randomized trial. Dis Colon Rectum 2014, 57:1202-08.
- [Chen H](https://www.ncbi.nlm.nih.gov/pubmed/?term=Chen%20H%5BAuthor%5D&cauthor=true&cauthor_uid=25529950)1, [Gu Y](https://www.ncbi.nlm.nih.gov/pubmed/?term=Gu%20Y%5BAuthor%5D&cauthor=true&cauthor_uid=25529950), [Sun G](https://www.ncbi.nlm.nih.gov/pubmed/?term=Sun%20G%5BAuthor%5D&cauthor=true&cauthor_uid=25529950), [Zhou Z](https://www.ncbi.nlm.nih.gov/pubmed/?term=Zhou%20Z%5BAuthor%5D&cauthor=true&cauthor_uid=25529950), [Zhu P](https://www.ncbi.nlm.nih.gov/pubmed/?term=Zhu%20P%5BAuthor%5D&cauthor=true&cauthor_uid=25529950), [Wu S](https://www.ncbi.nlm.nih.gov/pubmed/?term=Wu%20S%5BAuthor%5D&cauthor=true&cauthor_uid=25529950), [Yang B](https://www.ncbi.nlm.nih.gov/pubmed/?term=Yang%20B%5BAuthor%5D&cauthor=true&cauthor_uid=25529950). Ligation of intersphincteric fistula tract in the treatment of complicated fistula-in-ano. [Chinese Journal of Gastrointestinal Surgery](http://zhwcwkzz.yiigle.com/)  2014;17:1190-1193
- [Tian Y](https://www.ncbi.nlm.nih.gov/pubmed/?term=Tian%20Y%5BAuthor%5D&cauthor=true&cauthor_uid=26704001), [Zhang Z](https://www.ncbi.nlm.nih.gov/pubmed/?term=Zhang%20Z%5BAuthor%5D&cauthor=true&cauthor_uid=26704001), [An S](https://www.ncbi.nlm.nih.gov/pubmed/?term=An%20S%5BAuthor%5D&cauthor=true&cauthor_uid=26704001), [Jia S](https://www.ncbi.nlm.nih.gov/pubmed/?term=Jia%20S%5BAuthor%5D&cauthor=true&cauthor_uid=26704001), [Liu L](https://www.ncbi.nlm.nih.gov/pubmed/?term=Liu%20L%5BAuthor%5D&cauthor=true&cauthor_uid=26704001), [Yu H](https://www.ncbi.nlm.nih.gov/pubmed/?term=Yu%20H%5BAuthor%5D&cauthor=true&cauthor_uid=26704001). Clinical observation of the ligation of intersphincteric fistula tract in the treatment of simple anal fistula. [Zhonghua Wei Chang Wai Ke Za Zhi.](https://www.ncbi.nlm.nih.gov/pubmed/26704001) 2015,18:1211-4.
- [Zheng Y](https://www.ncbi.nlm.nih.gov/pubmed/?term=Zheng%20Y%5BAuthor%5D&cauthor=true&cauthor_uid=26813138), [Wang Z](https://www.ncbi.nlm.nih.gov/pubmed/?term=Wang%20Z%5BAuthor%5D&cauthor=true&cauthor_uid=26813138), [Yang X](https://www.ncbi.nlm.nih.gov/pubmed/?term=Yang%20X%5BAuthor%5D&cauthor=true&cauthor_uid=26813138), [Cui J](https://www.ncbi.nlm.nih.gov/pubmed/?term=Cui%20J%5BAuthor%5D&cauthor=true&cauthor_uid=26813138), [Chen C](https://www.ncbi.nlm.nih.gov/pubmed/?term=Chen%20C%5BAuthor%5D&cauthor=true&cauthor_uid=26813138), [Zhang X](https://www.ncbi.nlm.nih.gov/pubmed/?term=Zhang%20X%5BAuthor%5D&cauthor=true&cauthor_uid=26813138), [Wang X](https://www.ncbi.nlm.nih.gov/pubmed/?term=Wang%20X%5BAuthor%5D&cauthor=true&cauthor_uid=26813138), [Zhang X](https://www.ncbi.nlm.nih.gov/pubmed/?term=Zhang%20X%5BAuthor%5D&cauthor=true&cauthor_uid=26813138), [Che X](https://www.ncbi.nlm.nih.gov/pubmed/?term=Che%20X%5BAuthor%5D&cauthor=true&cauthor_uid=26813138), [Chen J](https://www.ncbi.nlm.nih.gov/pubmed/?term=Chen%20J%5BAuthor%5D&cauthor=true&cauthor_uid=26813138), [Cui F](https://www.ncbi.nlm.nih.gov/pubmed/?term=Cui%20F%5BAuthor%5D&cauthor=true&cauthor_uid=26813138), [Song W](https://www.ncbi.nlm.nih.gov/pubmed/?term=Song%20W%5BAuthor%5D&cauthor=true&cauthor_uid=26813138), [Chen Y](https://www.ncbi.nlm.nih.gov/pubmed/?term=Chen%20Y%5BAuthor%5D&cauthor=true&cauthor_uid=26813138). A multicenter randomized controlled clinical trial of Ligation of the Intersphincteric Fistula Tract Plus Bioprosthetic Anal Fistula Plug in the treatment of chronic anal fistula. [Zhonghua Yi Xue Za Zhi.](https://www.ncbi.nlm.nih.gov/pubmed/26813138) 2015, 95:3454-7.
- [Wu W](https://www.ncbi.nlm.nih.gov/pubmed/?term=Wu%20W%5BAuthor%5D&cauthor=true&cauthor_uid=25529951), [Yang G](https://www.ncbi.nlm.nih.gov/pubmed/?term=Yang%20G%5BAuthor%5D&cauthor=true&cauthor_uid=25529951), [Du Z](https://www.ncbi.nlm.nih.gov/pubmed/?term=Du%20Z%5BAuthor%5D&cauthor=true&cauthor_uid=25529951), [Zhang X](https://www.ncbi.nlm.nih.gov/pubmed/?term=Zhang%20X%5BAuthor%5D&cauthor=true&cauthor_uid=25529951), [Song Y](https://www.ncbi.nlm.nih.gov/pubmed/?term=Song%20Y%5BAuthor%5D&cauthor=true&cauthor_uid=25529951), [Qiu J](https://www.ncbi.nlm.nih.gov/pubmed/?term=Qiu%20J%5BAuthor%5D&cauthor=true&cauthor_uid=25529951), [Liao X](https://www.ncbi.nlm.nih.gov/pubmed/?term=Liao%20X%5BAuthor%5D&cauthor=true&cauthor_uid=25529951), [Shen Z](https://www.ncbi.nlm.nih.gov/pubmed/?term=Shen%20Z%5BAuthor%5D&cauthor=true&cauthor_uid=25529951).. Modified ligation of the intersphincteric fistula tract in the treatment of simple transsphincteric perianal fistula. [Zhonghua Wei Chang Wai Ke Za Zhi.](https://www.ncbi.nlm.nih.gov/pubmed/25529951) 2014, 17:1194-7.
- Iesalnieks I, Deimel S, Snippe K, Dajchin D. Placement of Seton before ligation of intersphincteric fistula tract (LIFT) significantly improves long-term results in patients with high anal fistula. Colorectal Dis 2018, 20 (Suppl 4): 133.
